# Supplementary material
Source: MDPI journal article supplement (https://www.mdpi.com/2075-4442/12/5/178)
Supplement: s1 [file s1]

# Investigation of the Tribological Properties of Hybrid Additive-Modified Water-Based Lubricating Fluid

Raimondas Kreivaitis, Jolanta Treinytė, Artūras Kupčinskas, Milda Gumbytė and Eglė Sendžikienė \*

Agriculture Academy, Vytautas Magnus University, K. Donelaičio str. 58, 44248 Kaunas, Lithuania

\* Correspondence: egle.sendzikiene@vdu.lt; Tel.: +370-37-75-22-92

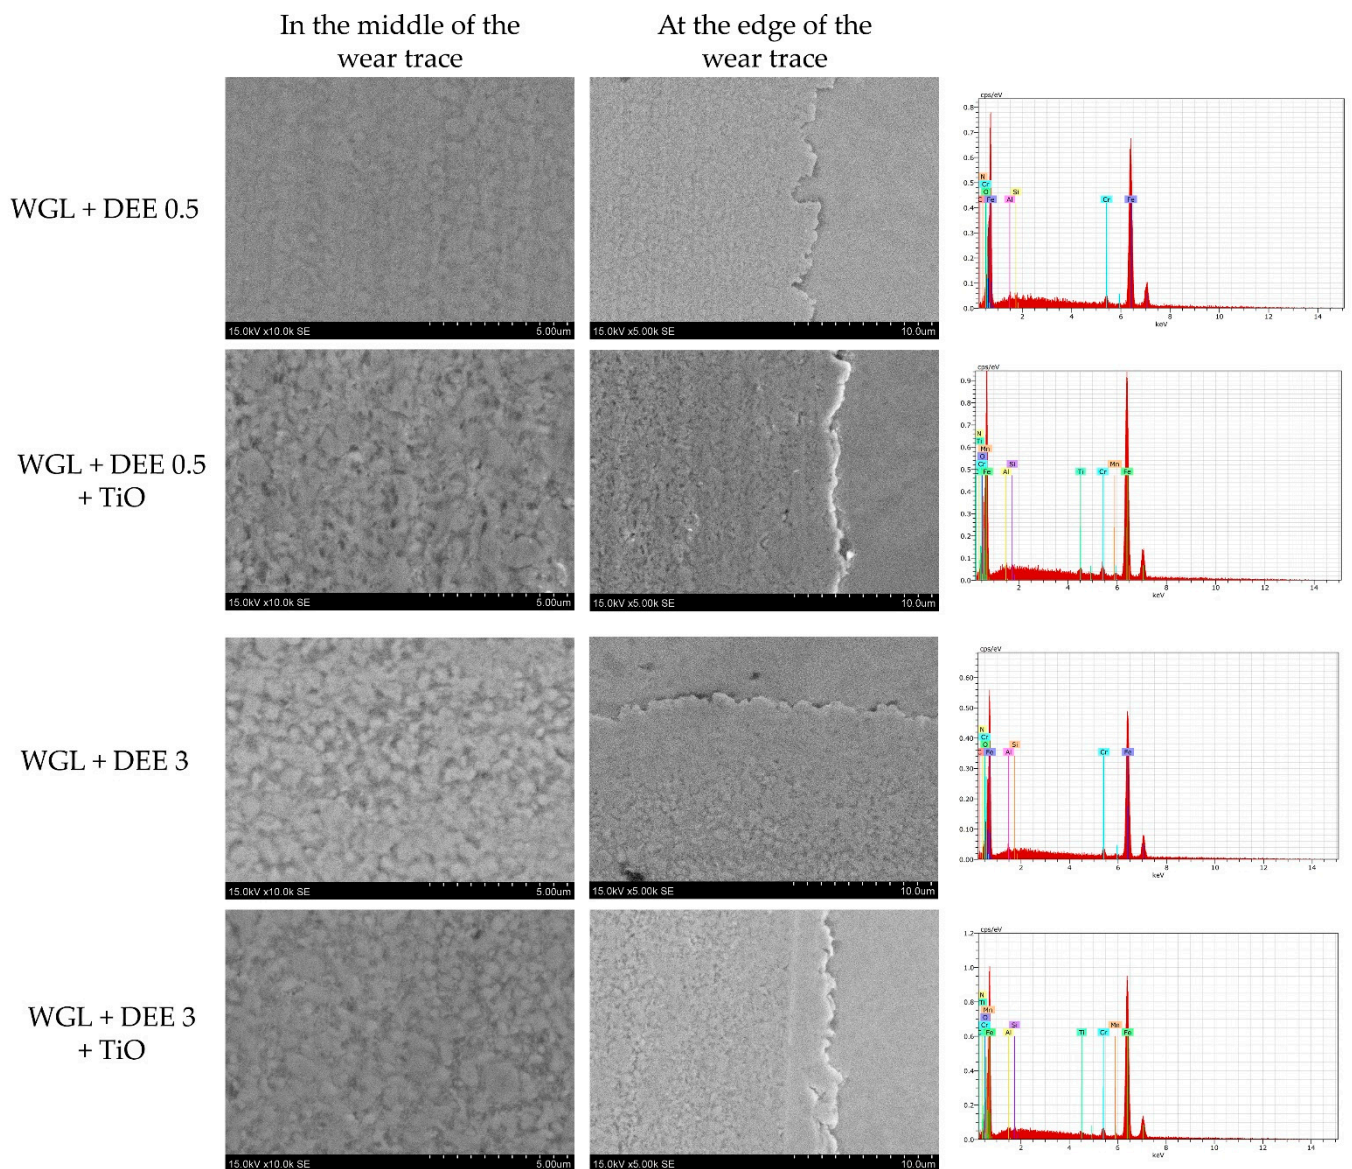

**Figure S1.** SEM images of the wear traces in the Alumina/Bearing steel friction pair and EDS graphs obtained when measuring the composition in the wear traces.

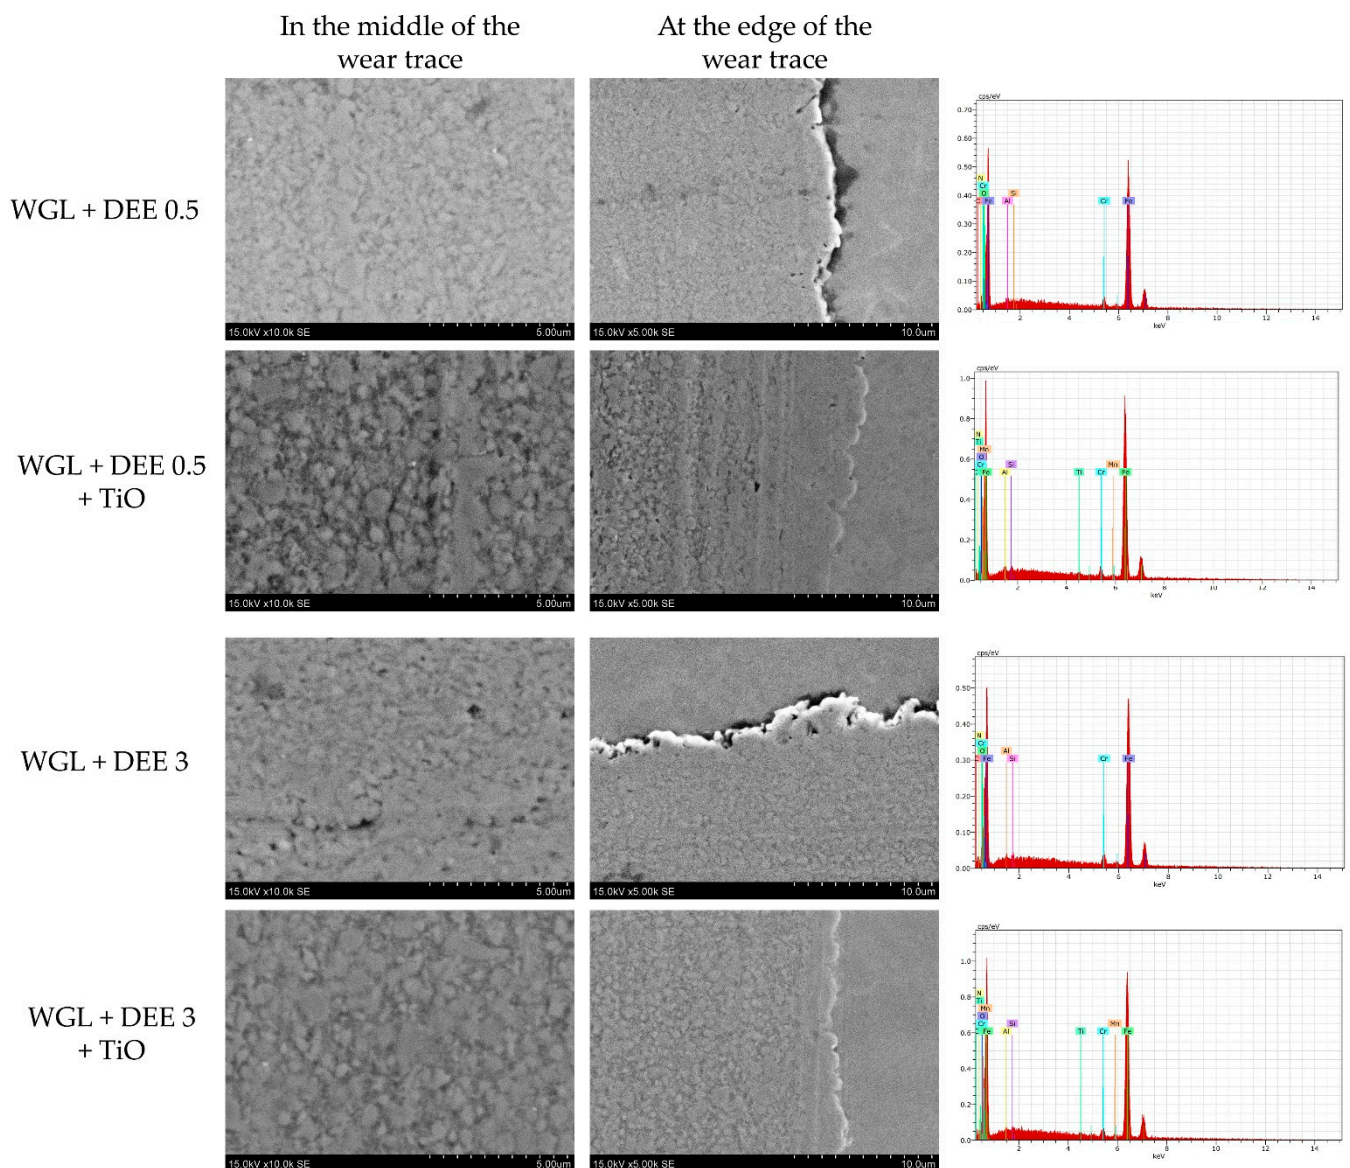

**Figure S2.** SEM images of the wear traces in the WC/Bearing steel friction pair and EDS graphs obtained when measuring the composition in the wear traces.

**Table S1.** Atomic [%] composition of the wear traces on the plate observed after lubrication of Alumina/Bearing steel friction pair with protic ionic liquid and hybrid additive modified base fluid.

| Elements of interest | WGL+DEE 0.5 | WGL+DEE 0.5+TiO | WGL+DEE 3 | WGL+DEE 3+TiO |
|----------------------|-------------|-----------------|-----------|---------------|
| C                    | 1.27        | 0.64            | 1.13      | 0.50          |
| O                    | 4.22        | 3.99            | 5.32      | 3.41          |
| N                    | 2.55        | 3.24            | 2.80      | 1.20          |
| Ti                   | -           | 1.01            | -         | 0.85          |
| Other                | Balance     |                 |           |               |

\*Other elements refer to Fe, Cr, Si, Al, and Mn.

**Table S2.** Atomic [%] composition of the wear traces on the plate observed after lubrication of WC/Bearing steel friction pair with protic ionic liquid and hybrid additive modified base fluid.

| Elements of interest | WGL+DEE 0.5 | WGL+DEE 0.5+TiO | WGL+DEE 3 | WGL+DEE 3+TiO |
|----------------------|-------------|-----------------|-----------|---------------|
| C                    | 1.35        | 2.21            | 1.59      | 1.74          |
| O                    | 2.98        | 5.50            | 3.98      | 2.90          |
| N                    | 3.12        | 1.19            | 4.80      | 2.67          |
| Ti                   | -           | 1.08            | -         | 1.25          |
| Other                | Balance     |                 |           |               |

\*Other elements refer to Fe, Cr, Si, Al, and Mn.
